# Supplementary material
Source: Springer Nature journal article supplement (https://www.springermedizin.de/resource/supplementary/12884_2009_271_MOESM3_ESM.pdf/9457480)

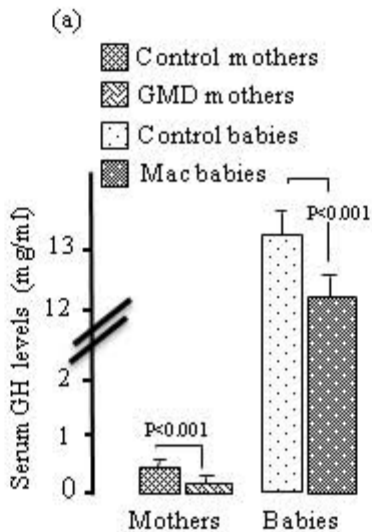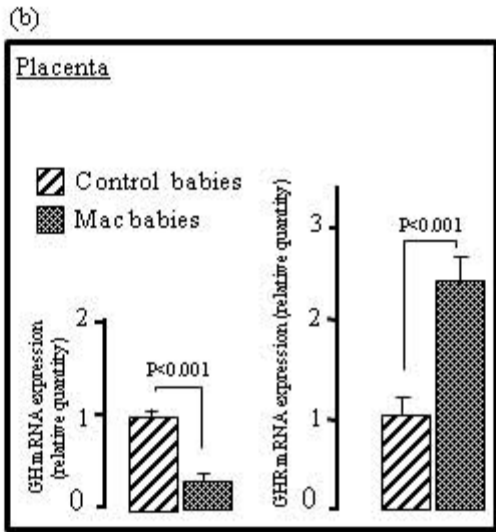

Supplement: MOESM3 [file 9457480]
